# Supplementary material for: Reconstructing central African hydroclimate over the past century using freshwater bivalve shell geochemistry
Source: Copernicus journal article supplement (doi:10.5194/bg-22-2621-2025), 2025-06-06
Supplement: Supplementary file 1 [file bg-22-2621-2025-supplement.zip]

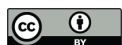

*Supplement of*

**Reconstructing central African hydroclimate over the past century using freshwater bivalve shell geochemistry**

**Zita Kelemen et al.**

*Correspondence to:* Zita Kelemen ([zitakelemen2@gmail.com](mailto:zitakelemen2@gmail.com)) and Steven Bouillon ([steven.bouillon@kuleuven.be](mailto:steven.bouillon@kuleuven.be))

- [bg-22-2621-2025-supplement-title-page.pdf](#)
- [Kelemen et al 2024 Egusphere CP\\_supplement.xlsx](#)

The copyright of individual parts of the supplement might differ from the article licence.
