# Supplementary material for: Reconstructing central African hydroclimate over the past century using freshwater bivalve shell geochemistry
Source: Copernicus journal article supplement (doi:10.5194/bg-22-2621-2025), 2025-06-06
Supplement: Supplementary file 1 [file bg-22-2621-2025-supplement.zip]

## Sheet: File info
Zita Kelemen, David P. Gillikin, and Steven Bouillon
Reconstructing Central African hydro-climate over the past century using freshwater bivalve shell geochemistry
Supplementary material: full dataset; this file contains the full previously unpublished data used in the manuscript.

## Sheet: 1891A
Sample ID	d13C	d18O	Distance from tip (mm)
1891A 1	-12.0257	-3.10276	0.15			Location	confluence of Oubangui and Congo
1891A 2	-13.479	-2.95348	0.5			River	Oubangui River
1891A 3	-14.2474	-2.60419	0.85			Species	Chambardia wissmanni
1891A 4	-14.6911	-2.52329	1.2			Collected	23/08/1891
1891A 5	-14.5575	-2.59771	1.55
1891A 6	-14.2213	-2.86229	1.9
1891A 7	-13.9926	-2.64222	2.25
1891A 8	-13.9279	-2.87076	2.6
1891A 9	-14.2742	-3.33907	2.95
1891A 10	-13.5917	-3.41116	4
1891A 11	-12.3947	-3.78871	4.35
1891A 12	-12.5404	-3.01165	4.7
1891A 13	-12.7176	-3.19057	5.05
1891A 14	-12.5347	-2.96463	5.4
1891A 15	-12.5056	-2.9062	5.75
1891A 16	-13.2147	-3.4001	6.1
1891A 17	-13.3219	-3.80393	6.45
1891A 18	-13.3682	-3.6945	6.8
1891A 19	-12.968	-3.95519	7.15
1891A 20	-12.4177	-3.22964	7.5
1891A 21	-12.3367	-3.0585	7.85
1891A 22	-12.4906	-2.89877	8.2
1891A 23	-12.3181	-2.82616	8.55
1891A 24	-12.0973	-2.85365	8.9
1891A 25	-11.9674	-2.66279	9.6
1891A 26	-12.3838	-2.7354	9.95
1891A 27	-12.9537	-2.28161	10.3
1891A 28	-12.9109	-2.729	10.65
1891A 29	-12.2732	-2.59952	11
1891A 30	-11.9473	-2.71543	11.35
1891A 31	-11.2325	-2.40063	12.05
1891A 32	-11.0436	-2.65865	12.4
1891A 33	-11.1824	-2.57636	12.75
1891A 34	-11.2918	-2.74335	13.1
1891A 35	-11.1277	-2.8106	13.45
1891A 36	-10.826	-2.98901	14.15
1891A 37	-10.7843	-2.97448	14.5
1891A 38	-10.6432	-3.02099	14.85
1891A 39	-11.8268	-3.12774	15.2
1891A 40	-12.4108	-2.51032	15.55
1891A 41	-12.9762	-2.47661	15.9
1891A 42	-13.6349	-2.63669	16.25
1891A 43	-13.8019	-2.52138	16.6
1891A 44	-13.8962	-2.5914	16.95
1891A 45	-13.8167	-2.55475	17.3
1891A 46	-13.1757	-2.59209	17.65
1891A 47	-12.0827	-3.11261	18
1891A 48	-10.7524	-2.96549	18.35
1891A 49	-10.8551	-2.74041	18.7
1891A 50	-10.3787	-2.794	19.05
1891A 51	-9.99291	-3.0196	19.4
1891A 52	-10.0144	-3.07216	19.75
1891A 53	-10.0326	-3.27148	20.1
1891A 54	-10.2016	-2.98537	20.45
1891A 55	-11.1449	-2.81752	21.15
1891A 56	-10.977	-2.55423	21.5
1891A 57	-10.0233	-2.65173	21.85
1891A 58	-9.07027	-2.65692	22.2
1891A 59	-8.92022	-2.71154	22.55
1891A 60	-8.45613	-2.80766	22.9
1891A 61	-8.08512	-2.80127	23.25
1891A 62	-7.89307	-2.84829	23.6
1891A 63	-7.7494	-2.85762	23.95
1891A 64	-8.25231	-3.00906	24.3
1891A 65	-8.82159	-2.95927	24.65
1891A 66	-11.8345	-3.47754	25
1891A 67	-12.8163	-3.54859	25.35
1891A 68	-13.116	-3.71974	26.05
1891A 69	-13.0537	-2.62165	26.4
1891A 70	-12.3188	-2.78026	26.75
1891A 71	-11.0673	-2.84483	27.1
1891A 72	-10.4906	-2.73281	27.45
1891A 73	-10.1364	-2.61318	27.8
1891A 74	-9.85294	-2.63271	28.15
1891A 75	-9.70642	-2.96394	28.5
1891A 76	-9.44396	-2.86143	28.85
1891A 77	-9.37087	-2.91294	29.2
1891A 78	-9.33995	-3.12419	29.55
1891A 79	-8.99214	-3.12333	29.9
1891A 80	-8.76026	-2.93282	30.25
1891A 81	-8.75623	-2.86246	30.6
1891A 82	-8.92509	-2.95443	30.95
1891A 83	-9.00894	-2.94994	31.3
1891A 84	-12.4458	-3.20579	32
1891A 85	-12.4711	-3.19922	32.35
1891A 86	-12.1117	-3.06023	32.7
1891A 87	-10.5802	-3.12333	33.05
1891A 88	-9.19192	-2.96186	33.4
1891A 89	-8.76194	-3.11365	33.75
1891A 90	-8.62231	-3.07043	34.1
1891A 91	-8.51595	-3.17173	34.45
1891A 92	-8.3822	-3.28358	34.8
1891A 93	-8.82411	-3.45835	35.15
1891A 94	-9.46429	-3.58715	35.5
1891A 95	-10.1855	-4.96615	35.85
1891A 96	-9.81682	-4.88421	36.2
1891A 97	-9.8064	-4.45289	36.55
1891A 98	-9.58175	-4.27068	37.25
1891A 99	-9.36398	-3.93324	37.6
1891A 100	-8.97281	-3.75328	37.95
1891A 101	-8.82142	-3.53546	38.3
1891A 102	-8.65356	-3.34011	38.65
1891A 103	-8.51527	-2.93835	39
1891A 104	-8.40807	-3.24693	39.35
1891A 105	-8.4284	-2.95201	39.7
1891A 106	-8.40942	-3.43398	40.05
1891A 107	-8.25197	-3.20147	40.4
1891A 108	-8.17048	-3.18798	40.75
1891A 109	-8.17199	-3.30847	41.1
1891A 110	-8.13469	-3.04899	41.45
1891A 111	-8.11923	-3.29482	41.8
1891A 112	-7.99136	-3.2229	42.15
1891A 113	-7.93272	-3.48792	42.5
1891A 114	-7.84468	-3.77454	42.85
1891A 115	-7.7331	-3.62846	43.55
1891A 116	-7.6548	-3.53459	43.9
1891A 117	-7.70336	-4.10369	44.25
1891A 118	-7.51635	-3.87083	44.6
1891A 119	-7.62506	-3.65353	44.95
1891A 120	-7.64321	-3.19974	45.3
1891A 121	-7.95507	-2.85658	45.65
1891A 122	-8.05757	-3.06334	46
1891A 123	-7.99825	-3.63711	46.35
1891A 124	-8.61374	-4.0252	46.7
1891A 125	-8.34775	-3.68067	47.05
1891A 126	-8.07991	-3.76953	47.4
1891A 127	-7.84451	-3.55707	47.75
1891A 128	-7.67312	-3.47115	48.1
1891A 129	-7.56709	-3.91387	48.45
1891A 130	-7.76839	-3.30623	48.8
1891A 131	-7.87341	-3.68862	49.15
1891A 132	-8.68994	-3.73115	49.5
1891A 133	-8.62819	-3.70211	49.85
1891A 134	-10.557	-4.56924	50.2
1891A 135	-10.3953	-4.34052	50.55
1891A 136	-10.1572	-4.5274	50.9
1891A 137	-9.71331	-4.5217	51.25
1891A 138	-9.51218	-3.91336	51.6
1891A 139	-9.10606	-3.69139	51.95
1891A 140	-9.02616	-4.02132	52.3
1891A 141	-8.85553	-3.81257	52.65
1891A 142	-8.74312	-3.71058	53
1891A 143	-8.78227	-3.4428	53.35
1891A 144	-8.84914	-3.81568	53.7
1891A 145	-8.69237	-3.20752	54.05
1891A 146	-8.68129	-3.34996	54.75
1891A 147	-8.65188	-3.21927	55.1
1891A 148	-8.68943	-3.34841	55.45
1891A 149	-8.69036	-3.56588	55.8
1891A 150	-8.69876	-2.91156	56.15
1891A 151	-8.64113	-3.10448	56.5
1891A 152	-8.55342	-3.58075	56.85
1891A 153	-8.56669	-3.21599	57.2
1891A 154	-8.56115	-2.80593	57.55
1891A 155	-8.71069	-2.94994	59.5
1891A 156	-8.72027	-3.30778	59.85
1891A 157	-8.83133	-3.4179	60.2
1891A 158	-8.79269	-3.73979	60.55
1891A 159	-8.81974	-3.49276	60.9
1891A 160	-8.80176	-3.31781	61.25
1891A 161	-8.73556	-3.28393	61.6
1891A 162	-8.66599	-3.45075	61.95
1891A 163	-8.46117	-2.87612	62.3
1891A 164	-8.32708	-3.27494	62.65
1891A 165	-8.10982	-3.45213	63
1891A 166	-8.0574	-3.38972	63.35
1891A 167	-8.16981	-3.16447	63.7
1891A 168	-7.89844	-3.29983	64.05
1891A 169	-7.87173	-2.97155	64.4
1891A 170	-7.85711	-3.26698	64.75
1891A 171	-7.93121	-3.41859	65.1
1891A 172	-7.87223	-2.95028	65.45
1891A 173	-7.70588	-3.11105	65.8
1891A 174	-7.94835	-3.11883	66.15
1891A 175	-7.679	-3.19542	66.5
1891A 176	-7.62775	-3.29534	66.85
1891A 177	-7.31455	-3.05055	67.2
1891A 178	-7.24179	-3.16188	67.55
1891A 179	-7.01084	-2.78545	67.9
1891A 180	-7.13459	-2.56875	68.25
1891A 181	-7.0983	-2.91761	68.6
1891A 182	-7.04033	-2.7399	68.95
1891A 183	-7.12905	-3.03447	69.3
1891A 184	-7.01445	-3.01788	69.65
1891A 185	-7.11728	-3.10431	70
1891A 186	-7.00386	-3.16343	70.35
1891A 187	-7.03041	-3.06801	70.7
1891A 188	-7.05192	-2.70912	71.05
1891A 189	-7.08133	-2.65916	71.4
1891A 190	-7.16349	-2.58898	71.75
1891A 191	-7.06503	-2.7819	72.1
1891A 192	-7.23272	-2.63427	72.45
1891A 193	-7.11275	-2.75649	72.8
1891A 194	-7.15895	-2.58604	73.15
1891A 195	-7.49333	-2.80369	73.5
1891A 196	-7.31581	-2.84794	73.85
1891A 197	-7.24364	-2.88061	74.2
1891A 198	-7.29892	-2.99004	74.55
1891A 199	-7.3668	-2.87024	74.9
1891A 200	-7.40831	-3.03793	75.25
1891A 201	-7.48711	-3.1503	75.95
1891A 202	-7.41654	-3.1802	76.3
1891A 203	-7.37773	-3.17311	76.65
1891A 204	-7.45569	-3.12678	77
1891A 205	-7.41637	-3.0177	77.35
1891A 206	-7.35908	-3.26353	77.7
1891A 207	-7.35924	-3.24572	78.05
1891A 208	-7.77394	-3.12557	78.4
1891A 209	-7.35941	-3.58386	79.1
1891A 210	-7.51114	-3.62621	79.45
1891A 211	-7.5387	-3.76296	79.8
1891A 212	-7.86148	-3.72769	80.15

## Sheet: 1891D
Sample ID	d13C	d18O	Distance from tip (mm)
1891D 1	-11.7207	-3.46016	0			Location	Bangui
1891D 2	-11.4099	-3.25902	0.35			River	Oubangui River
1891D 3	-10.8363	-3.15723	0.7			Species	Chambardia wissmanni
1891D 4	-10.3881	-3.47882	1.05			Collected	12/1891
1891D 5	-12.0533	-3.56644	1.75
1891D 6	-12.8383	-3.61287	2.1
1891D 7	-13.2754	-3.48352	2.45
1891D 8	-12.9466	-3.72274	2.8
1891D 9	-13.4576	-3.6933	3.15
1891D 10	-14.7881	-4.01537	3.5
1891D 11	-14.9825	-3.96942	3.85
1891D 12	-14.0388	-3.86664	4.2
1891D 13	-13.3696	-3.68418	4.55
1891D 14	-13.0175	-3.30151	4.9
1891D 15	-13.1806	-2.71873	5.25
1891D 16	-13.062	-2.74036	5.6
1891D 17	-12.955	-2.55842	5.95
1891D 18	-12.5999	-2.92154	6.3
1891D 19	-12.4166	-2.92299	6.65
1891D 20	-11.8785	-2.80193	7
1891D 21	-11.8583	-2.49119	7.35
1891D 22	-11.8171	-2.38239	7.7
1891D 23	-11.6983	-2.58447	8.05
1891D 24	-11.6755	-2.78887	8.4
1891D 25	-11.405	-2.79923	8.75
1891D 26	-10.9156	-3.03016	9.1
1891D 27	-9.94212	-2.67485	9.45
1891D 28	-8.76392	-2.59695	9.8
1891D 29	-8.65824	-3.14369	10.15
1891D 30	-9.21025	-3.19476	10.5
1891D 31	-9.86543	-3.22834	10.85
1891D 32	-10.0371	-3.22917	11.2
1891D 33	-10.0379	-3.42506	11.55
1891D 34	-9.51905	-3.43494	11.9
1891D 35	-9.53894	-3.34581	12.25
1891D 36	-9.79986	-3.37552	12.6
1891D 37	-10.5348	-3.41871	12.95
1891D 38	-11.0569	-3.4612	13.3
1891D 39	-11.3715	-3.52512	13.65
1891D 40	-11.6947	-3.61847	14
1891D 41	-11.7901	-3.79806	14.35
1891D 42	-11.5209	-3.49969	14.7
1891D 43	-11.6101	-3.44123	15.05
1891D 44	-11.3798	-3.21134	15.4
1891D 45	-11.1799	-3.08427	15.75
1891D 46	-11.0027	-2.71355	16.1
1891D 47	-10.9834	-2.69282	16.45
1891D 48	-11.1416	-2.33575	16.8
1891D 49	-11.092	-2.12897	17.15
1891D 50	-11.2653	-2.38809	17.5
1891D 51	-11.3098	-2.20757	17.85
1891D 52	-11.6327	-2.41228	18.2
1891D 53	-11.9238	-2.05068	18.55
1891D 54	-11.8421	-2.20782	18.9
1891D 55	-11.9435	-2.36121	19.25
1891D 56	-12.135	-2.72944	19.6
1891D 57	-11.9825	-2.74969	19.95
1891D 58	-11.4024	-2.46859	20.3
1891D 59	-10.864	-2.35852	20.65
1891D 60	-10.5617	-2.62027	21
1891D 61	-10.1437	-2.59263	21.35
1891D 62	-9.89357	-2.73532	21.7
1891D 63	-9.65706	-2.68045	22.05
1891D 64	-9.58121	-2.71901	22.4
1891D 65	-9.69721	-2.64963	22.75
1891D 66	-10.0762	-2.84774	23.1
1891D 67	-10.1911	-2.65482	23.45
1891D 68	-9.40291	-2.87265	23.8
1891D 69	-8.85912	-2.93128	24.15
1891D 70	-7.90362	-3.34304	24.5
1891D 71	-7.4196	-3.04343	24.85
1891D 72	-7.35932	-3.16283	25.2
1891D 73	-7.26935	-3.00998	25.55
1891D 74	-7.15962	-3.00048	25.9
1891D 75	-7.104	-2.8977	26.25
1891D 76	-7.19232	-2.93121	26.6
1891D 77	-7.18996	-2.91117	26.95
1891D 78	-7.25941	-2.74223	27.3
1891D 79	-7.54541	-3.071	27.65
1891D 80	-8.06695	-2.83568	28
1891D 81	-8.33782	-3.10707	28.35
1891D 82	-8.44731	-2.92693	28.7
1891D 83	-8.83944	-3.17375	29.05
1891D 84	-8.88805	-2.96859	29.4
1891D 85	-9.10487	-3.00591	29.75
1891D 86	-8.93855	-2.81754	30.42
1891D 87	-9.0537	-2.72502	30.77
1891D 88	-9.35042	-2.54156	31.12
1891D 89	-9.73716	-2.49119	31.47
1891D 90	-9.80609	-2.79025	31.82
1891D 91	-9.87722	-2.9243	32.17
1891D 92	-10.0056	-2.92009	32.52
1891D 93	-10.0709	-3.0796	32.87
1891D 94	-10.1046	-3.16062	33.22
1891D 95	-10.239	-3.25342	33.57
1891D 96	-10.703	-3.37904	33.92
1891D 97	-10.9348	-3.19372	34.27
1891D 98	-11.1854	-3.49454	34.62
1891D 99	-11.6747	-3.26192	34.97
1891D 100	-11.2828	-2.99444	35.32
1891D 101	-10.7901	-2.8787	35.67
1891D 102	-10.3731	-2.92465	36.02
1891D 103	-10.0598	-2.94469	36.37
1891D 104	-9.92587	-2.86515	36.72
1891D 105	-9.75698	-2.57369	37.07
1891D 106	-9.66151	-2.53078	37.42
1891D 107	-9.53826	-2.57881	37.77
1891D 108	-9.42651	-2.5814	38.12
1891D 109	-9.27768	-2.61681	38.47
1891D 110	-9.27296	-2.61536	38.82
1891D 111	-9.22677	-2.2188	39.17
1891D 112	-9.37948	-2.23297	39.52
1891D 113	-9.54939	-2.25715	39.87
1891D 114	-9.55997	-2.27539	40.22
1891D 115	-9.71862	-2.31139	40.57
1891D 116	-9.55006	-2.39379	40.92
1891D 117	-9.61917	-2.64376	41.27
1891D 118	-9.77195	-2.82141	41.62
1891D 119	-9.54864	-2.53887	41.97
1891D 120	-9.6222	-2.48397	42.32
1891D 121	-9.51932	-2.71155	42.67
1891D 122	-9.23817	-2.56457	43.02
1891D 123	-9.13474	-2.537	43.37
1891D 124	-8.77673	-2.55376	43.72
1891D 125	-8.62369	-2.60147	44.07
1891D 126	-8.667	-2.43076	44.42
1891D 127	-8.55121	-2.73566	44.77
1891D 128	-8.70931	-2.66829	45.12
1891D 129	-9.08384	-2.36667	45.47
1891D 130	-9.06968	-2.55635	45.82
1891D 131	-8.91616	-2.77809	46.17
1891D 132	-8.47907	-2.86833	46.52
1891D 133	-8.39361	-2.83154	46.87
1891D 134	-7.91609	-2.76106	47.22
1891D 135	-7.57915	-2.66069	47.57
1891D 136	-7.45021	-2.84346	47.92
1891D 137	-7.24558	-2.80856	48.27
1891D 138	-7.12658	-2.95816	48.62
1891D 139	-7.34402	-2.93363	48.97
1891D 140	-7.18592	-2.91981	49.32
1891D 141	-7.13198	-2.91615	49.67
1891D 142	-7.1367	-2.86039	50.02
1891D 143	-7.20058	-2.79215	50.37
1891D 144	-7.19165	-2.92534	50.72
1891D 145	-7.26632	-2.56499	51.07
1891D 146	-7.25536	-3.11692	51.42
1891D 147	-7.40807	-3.15751	51.77
1891D 148	-7.52822	-2.95346	52.12
1891D 149	-7.68275	-3.03949	52.47
1891D 150	-8.02174	-3.0484	53.17
1891D 151	-8.17203	-3.19123	53.52
1891D 152	-8.60629	-3.30317	53.87
1891D 153	-9.0444	-3.0929	54.22
1891D 154	-9.29864	-3.01855	54.57
1891D 155	-9.31564	-2.9916	55.27
1891D 156	-11.4801	-2.79778	55.97
1891D 157	-12.4297	-2.6079	56.67
1891D 158	-11.7283	-2.64842	57.02
1891D 159	-11.3229	-2.6875	57.37
1891D 160	-10.4358	-2.49471	57.72
1891D 161	-9.59112	-2.55421	58.07
1891D 162	-8.97421	-2.39335	58.42
1891D 163	-8.76689	-2.48601	58.77
1891D 164	-8.61273	-2.65032	59.12
1891D 165	-8.38805	-2.83516	59.47
1891D 166	-8.67142	-2.7955	59.82
1891D 167	-8.90564	-2.72792	60.17
1891D 168	-9.07845	-2.73445	60.52
1891D 169	-8.96535	-2.94227	60.87
1891D 170	-8.88461	-3.09031	61.22
1891D 171	-8.61172	-2.96628	61.57
1891D 172	-8.67061	-2.77705	62.27
1891D 173	-8.65524	-2.79218	62.97
1891D 174	-8.95523	-2.99029	63.57
1891D 175	-8.84881	-2.84733	64.17
1891D 176	-8.76477	-2.94883	64.77
1891D 177	-8.91798	-2.84857	65.37
1891D 178	-9.03307	-2.93024	66.17

## Sheet: 1904
Sample ID	d13C	d18O	Distance from tip (mm)
1904_1	-8.42862	-2.00939	1.65			Location	100-250km south from Bangui
1904_2	-8.47787	-2.02299	2			River	Oubangui River
1904_3	-8.59357	-1.45139	2.35			Species	Chambardia wissmanni
1904_4	-8.47652	-1.39646	2.7			Collected	~1904
1904_5	-8.43689	-1.48745	3.05
1904_6	-8.34716	-1.95922	3.4
1904_7	-8.30129	-1.91194	3.75
1904_8	-8.33856	-2.14765	4.1
1904_9	-8.28021	-2.12265	4.45
1904_10	-8.27295	-1.83966	4.8
1904_11	-8.35357	-2.07095	5.15
1904_12	-8.34008	-2.01755	5.5
1904_13	-8.36706	-2.0383	5.85
1904_14	-8.34936	-2.20173	6.2
1904_15	-8.3421	-2.29153	6.55
1904_16	-8.40771	-2.43405	6.9
1904_17	-8.32271	-2.37827	7.25
1904_18	-8.32473	-2.37469	7.6
1904_19	-8.32473	-2.98269	7.95
1904_20	-8.35172	-2.60088	8.3
1904_21	-8.43689	-2.59986	8.65
1904_22	-8.48074	-2.71908	9
1904_23	-8.60858	-2.75616	9.35
1904_24	-9.0621	-2.52214	10.05
1904_25	-9.03107	-2.69255	10.4
1904_26	-8.92296	-2.77554	11.1
1904_27	-8.84959	-2.84833	11.45
1904_28	-8.90795	-2.76857	11.8
1904_29	-8.92768	-2.83286	12.15
1904_30	-8.99008	-2.74986	12.5
1904_31	-9.01555	-2.69816	12.85
1904_32	-9.03258	-2.62793	13.2
1904_33	-9.04119	-2.68133	13.55
1904_34	-9.10325	-2.6218	13.9
1904_35	-9.30952	-2.59034	14.25
1904_36	-9.48813	-2.58167	14.6
1904_37	-9.56605	-2.55241	14.95
1904_38	-9.62373	-2.59272	15.3
1904_39	-9.94991	-2.57435	15.65
1904_40	-10.3011	-2.66262	16
1904_41	-10.5829	-2.59119	16.35
1904_42	-11.142	-2.68558	16.7
1904_43	-11.722	-2.67061	17.05
1904_44	-12.7685	-2.68592	17.4
1904_45	-13.1495	-2.80633	17.75
1904_46	-13.2583	-2.78762	18.1
1904_47	-13.8565	-2.69408	18.45
1904_48	-14.446	-2.79136	18.8
1904_49	-15.0852	-2.80293	19.15
1904_50	-15.6277	-2.92844	19.5
1904_51	-15.7077	-2.82401	19.85
1904_52	-15.2193	-2.81262	20.2
1904_53	-14.7447	-2.82537	20.55
1904_54	-14.0231	-2.52333	20.9
1904_55	-13.937	-2.515	21.25
1904_56	-13.7273	-2.41432	21.6
1904_57	-13.8172	-2.41857	21.95
1904_58	-14.1483	-2.44833	22.3
1904_59	-14.3281	-2.54374	22.65
1904_60	-14.3247	-2.50361	23
1904_61	-14.0793	-2.67639	23.35
1904_62	-13.8606	-2.65531	23.7
1904_63	-13.5401	-2.60122	24.05
1904_64	-13.3826	-2.66704	24.4
1904_65	-13.5261	-2.65327	24.75
1904_66	-13.787	-2.77707	25.1
1904_67	-13.854	-2.78269	25.45
1904_68	-13.8255	-2.75361	25.8
1904_69	-13.6772	-2.80088	26.15
1904_70	-13.4075	-2.70752	26.5
1904_71	-13.5546	-2.69901	26.85
1904_72	-13.4315	-2.76653	27.2
1904_73	-13.3804	-2.86279	27.55
1904_74	-13.3117	-2.88677	27.9
1904_75	-13.3404	-2.8599	28.25
1904_76	-13.2544	-2.65701	28.6
1904_77	-13.2046	-2.67384	28.95
1904_78	-13.2419	-2.73405	29.3
1904_79	-13.2922	-2.73048	29.65
1904_80	-13.2746	-2.71908	30
1904_81	-13.2156	-2.72605	30.35
1904_82	-13.1748	-2.73235	30.7
1904_83	-13.125	-2.79119	31.05
1904_84	-13.0566	-2.68048	31.4
1904_85	-12.922	-2.68507	31.75
1904_86	-12.924	-2.72418	32.1
1904_87	-12.7307	-2.86568	32.45
1904_88	-12.7817	-2.87827	32.8
1904_89	-12.6628	-2.70207	33.15
1904_90	-12.9114	-2.715	33.5
1904_91	-12.7645	-2.74442	33.85
1904_92	-12.9188	-2.67384	34.2
1904_93	-12.8398	-2.53847	34.55
1904_94	-13.0652	-2.79255	34.9
1904_95	-12.9719	-2.72316	35.25
1904_96	-12.98	-2.72265	35.6
1904_97	-12.7333	-2.74204	35.95
1904_98	-12.8098	-2.89272	36.3
1904_99	-12.7909	-2.73762	36.65
1904_100	-12.8066	-2.88694	37
1904_101	-12.7388	-2.79425	37.35
1904_102	-12.6934	-2.80156	37.7
1904_103	-12.8662	-2.7633	38.05

## Sheet: 1908
Sample ID	d13C	d18O	Distance from tip (mm)
1908_1	-14.9468	-2.81722	0			Location	Longo
1908_2	-13.5867	-2.83395	0.35			River	Oubangui River
1908_3	-12.55	-2.98487	0.7			Species	Chambardia wissmanni
1908_4	-12.0492	-3.0252	1.05			Collected	1908-04-15
1908_5	-12.2839	-2.94254	1.4
1908_6	-12.4786	-2.92681	1.75
1908_7	-12.9034	-3.08359	2.1
1908_8	-13.1816	-3.02838	2.45
1908_9	-13.1438	-3.15069	2.8
1908_10	-12.9909	-3.07054	3.15
1908_11	-12.5942	-3.01934	3.5
1908_12	-12.9107	-2.79279	3.85
1908_13	-13.6741	-2.74126	4.2
1908_14	-14.0159	-2.73239	4.55
1908_15	-14.0978	-2.86323	4.9
1908_16	-14.199	-2.89218	5.25
1908_17	-14.1803	-3.11589	5.6
1908_18	-14.0093	-3.24941	5.95
1908_19	-13.7548	-3.39079	6.3
1908_20	-13.2644	-3.47127	6.65
1908_21	-11.0157	-3.14177	7
1908_22	-10.7257	-2.99154	7.35
1908_23	-10.5621	-3.16901	7.7
1908_24	-10.4709	-3.24788	8.05
1908_25	-10.5014	-3.31756	8.4
1908_26	-10.0769	-3.39409	8.75
1908_27	-9.84488	-3.17803	9.1
1908_28	-9.69786	-3.10066	9.45
1908_29	-9.90609	-3.20309	9.8
1908_30	-10.5545	-3.21462	10.15
1908_31	-11.2413	-3.36067	10.5
1908_32	-11.7228	-3.19691	10.85
1908_33	-12.1937	-3.53947	11.2
1908_34	-14.4316	-3.59478	11.55
1908_35	-14.2657	-3.53479	11.9
1908_36	-14.1512	-3.3575	12.25
1908_37	-13.9288	-3.58759	12.6
1908_38	-13.5921	-3.50287	12.95
1908_39	-12.6087	-3.06975	13.3
1908_40	-12.3691	-2.93206	13.65
1908_41	-11.712	-3.07042	14
1908_42	-11.0329	-3.0527	14.35
1908_43	-10.7146	-2.94843	14.7
1908_44	-9.95785	-2.9618	15.05
1908_45	-9.59214	-2.9877	15.4
1908_46	-9.61136	-2.99021	15.75
1908_47	-9.68049	-2.8064	16.1
1908_48	-9.87051	-3.0893	16.45
1908_49	-9.86056	-3.29667	16.8
1908_50	-9.98348	-3.22131	17.15
1908_51	-10.0715	-3.03666	17.5
1908_52	-10.0929	-3.21212	17.85
1908_53	-10.2108	-3.48917	18.2
1908_54	-10.1892	-3.35432	18.55
1908_55	-10.2163	-3.49519	18.9
1908_56	-10.2426	-3.34079	19.25
1908_57	-10.3183	-3.23484	19.6
1908_58	-10.4493	-3.36451	19.95
1908_59	-10.405	-3.43002	20.3
1908_60	-10.1312	-3.4362	20.65
1908_61	-10.1356	-3.5368	21
1908_62	-10.1701	-3.67415	21.35
1908_63	-10.2849	-3.77157	21.7
1908_64	-10.4886	-3.84811	22.05
1908_65	-10.7474	-3.84777	22.4
1908_66	-10.9339	-3.99465	22.75
1908_67	-11.1971	-3.82037	23.1
1908_68	-11.0255	-3.65276	23.45
1908_69	-10.8118	-3.46845	23.8
1908_70	-10.3768	-3.07643	24.15
1908_71	-10.3347	-3.08378	24.5
1908_72	-10.2342	-3.07242	24.85
1908_73	-10.4654	-2.78568	25.2
1908_74	-10.5807	-2.63696	25.55
1908_75	-10.8695	-2.61139	25.9
1908_76	-10.9508	-2.50144	26.25
1908_77	-11.0238	-2.46935	26.95
1908_78	-11.085	-2.44446	27.3
1908_79	-11.3256	-2.45465	27.65
1908_80	-11.186	-2.65467	28
1908_81	-11.9654	-2.70162	28.35
1908_82	-12.5498	-2.60972	28.7
1908_83	-13.8597	-2.86037	29.05
1908_84	-14.3306	-2.90967	29.4
1908_85	-14.5574	-2.98536	29.75
1908_86	-13.8567	-2.96314	30.1
1908_87	-12.4546	-2.83898	30.45
1908_88	-12.1666	-2.93323	30.8
1908_89	-11.4659	-2.92821	31.15
1908_90	-10.8344	-2.91317	31.5
1908_91	-10.4406	-2.94994	31.85
1908_92	-10.3286	-2.79904	32.2
1908_93	-10.3984	-2.81743	32.55
1908_94	-10.4141	-3.04652	32.9
1908_95	-10.4416	-2.92788	33.25
1908_96	-10.5375	-3.10016	33.6
1908_97	-10.8619	-2.97366	33.95
1908_98	-10.6909	-2.88193	34.3
1908_99	-10.6466	-3.07927	34.65
1908_100	-10.2656	-2.90464	35
1908_101	-9.64308	-2.94232	35.35
1908_102	-9.45531	-2.92809	35.7
1908_103	-8.61003	-3.00546	36.05
1908_104	-8.4894	-3.01601	36.4
1908_105	-8.24561	-3.09874	36.75
1908_106	-8.19143	-3.06742	37.1
1908_107	-8.07416	-3.00328	37.45
1908_108	-8.14113	-3.10963	37.8
1908_109	-8.15459	-3.20575	38.15
1908_110	-8.3861	-2.93244	38.5
1908_111	-8.53617	-3.01115	38.85
1908_112	-8.80032	-3.06675	39.2
1908_113	-9.15987	-3.21061	39.55
1908_114	-9.44892	-3.35983	39.9
1908_115	-9.76102	-3.12922	40.25
1908_116	-10.4502	-3.1257	40.6
1908_117	-10.8679	-3.13424	40.95
1908_118	-10.9886	-2.95455	41.3
1908_119	-10.8245	-3.2282	41.65
1908_120	-10.5582	-2.89928	42
1908_121	-10.2136	-2.88187	42.35
1908_122	-9.98143	-3.1185	42.7
1908_123	-9.85709	-3.24377	43.05
1908_124	-9.74941	-2.9574	43.4
1908_125	-9.81486	-3.16958	43.75
1908_126	-9.90269	-3.21145	44.1
1908_127	-10.1746	-3.18817	44.45
1908_128	-10.6598	-3.16774	44.8
1908_129	-11.2419	-3.02338	45.15
1908_130	-11.0713	-2.85842	45.5
1908_131	-10.612	-2.84469	45.85
1908_132	-10.5092	-2.59566	46.2
1908_133	-10.2537	-2.58075	46.55
1908_134	-9.92725	-2.62111	46.9
1908_135	-9.78138	-2.70418	47.25
1908_136	-9.63551	-2.59465	47.6
1908_137	-9.5317	-2.52582	47.95
1908_138	-9.46187	-2.89476	48.3
1908_139	-9.38936	-2.89761	48.65
1908_140	-9.47449	-2.92273	49
1908_141	-9.50478	-2.97833	49.35
1908_142	-9.52884	-2.81002	49.7
1908_143	-9.61363	-2.68961	50.05
1908_144	-9.59159	-2.70803	50.4
1908_145	-9.64678	-3.03527	50.75
1908_146	-9.71172	-2.90247	51.1
1908_147	-9.74891	-2.94249	51.45
1908_148	-9.74554	-2.89426	51.8
1908_149	-9.83421	-2.84988	52.15
1908_150	-9.86533	-2.98637	52.5
1908_151	-9.89882	-3.05955	52.85
1908_152	-9.89108	-3.15585	53.2
1908_153	-9.90672	-3.27458	53.55
1908_154	-9.93903	-3.26638	53.9
1908_155	-10.0788	-3.40488	54.25
1908_156	-10.2198	-3.33353	54.6
1908_157	-10.2575	-3.27743	54.95
1908_158	-10.4545	-3.40203	55.3
1908_159	-10.766	-3.24528	55.65
1908_160	-11.0794	-3.2771	56
1908_161	-11.1827	-3.19135	56.35
1908_162	-11.3247	-3.09908	56.7
1908_163	-11.5991	-3.23808	57.05
1908_164	-11.4565	-3.18683	57.4
1908_165	-11.5118	-3.04867	57.75
1908_166	-11.3944	-3.08434	58.1
1908_167	-11.314	-3.02656	58.45
1908_168	-11.2732	-2.87433	58.8
1908_169	-11.3348	-3.08769	59.15
1908_170	-11.2534	-3.00847	59.5
1908_171	-11.1972	-2.88689	59.85
1908_172	-11.1615	-2.86143	60.2
1908_173	-11.014	-2.71322	60.55
1908_174	-11.053	-2.76062	60.9
1908_175	-11.1013	-2.95187	61.25
1908_176	-11.0533	-2.98804	61.6
1908_177	-10.8328	-2.82124	61.95
1908_178	-10.4974	-2.77	62.3
1908_179	-10.305	-2.74002	62.65
1908_180	-10.2355	-2.71289	63
1908_181	-10.1885	-2.69815	63.35
1908_182	-9.95737	-2.71373	63.7
1908_183	-9.89915	-2.76112	64.05
1908_184	-9.59664	-2.59449	64.4
1908_185	-9.4676	-2.49266	64.75
1908_186	-9.38263	-2.69045	65.1
1908_187	-9.31971	-2.64657	65.45
1908_188	-9.19554	-2.51645	65.8
1908_189	-9.17182	-2.54023	66.15
1908_190	-9.27327	-2.667	66.5
1908_191	-9.49552	-2.61977	66.85
1908_192	-9.71223	-2.69112	68.33
1908_193	-9.63248	-2.61492	68.68
1908_194	-9.73074	-2.69664	69.03
1908_195	-9.69709	-2.66131	69.38
1908_196	-9.80847	-2.61961	69.73
1908_197	-9.80174	-2.67487	70.08
1908_198	-9.6949	-2.78674	70.78
1908_199	-9.6663	-2.88538	71.13

## Sheet: 1914A
Sample ID	d13C	d18O	Distance from tip (mm)
1914A 1	-10.5183	-3.58016	0.25			Location	Bangui
1914A 2	-10.8414	-4.24839	1			River	Oubangui River
1914A 3	-10.8872	-4.25781	1.75			Species	Chambardia wissmanni
1914A 4	-11.2162	-3.65038	2.5			Collected	1914-01-01
1914A 5	-12.5031	-3.48056	3.25
1914A 6	-13.0592	-3.24934	4
1914A 7	-12.0901	-3.01397	4.75
1914A 8	-11.8532	-2.8021	5.5
1914A 9	-11.5104	-2.69004	6.25
1914A 10	-10.1652	-2.68771	7
1914A 11	-9.9777	-2.74131	7.75
1914A 12	-10.006	-2.54049	8.5
1914A 13	-9.98285	-2.69288	9.25
1914A 14	-10.07	-2.89765	10
1914A 15	-9.95659	-3.1545	10.75
1914A 16	-9.78946	-2.98246	11.5
1914A 17	-10.0529	-2.90687	12.25
1914A 18	-10.0376	-2.89694	13
1914A 19	-9.58259	-3.03454	13.75
1914A 20	-9.25297	-3.17173	14.5
1914A 21	-9.77499	-3.24215	15.25
1914A 22	-10.7474	-3.24144	16
1914A 23	-10.8046	-3.19118	16.75
1914A 24	-10.4996	-3.2309	17.5
1914A 25	-10.2516	-3.72708	18.25
1914A 26	-10.341	-3.65636	19
1914A 27	-10.4457	-3.82506	19.75
1914A 28	-10.1684	-3.66436	20.5
1914A 29	-10.0329	-3.84401	21.25
1914A 30	-9.69613	-3.65453	22
1914A 31	-9.64342	-3.58736	22.75
1914A 32	-9.91825	-3.33293	23.5
1914A 33	-10.119	-3.38542	24.25
1914A 34	-10.1168	-3.4146	25
1914A 35	-10.0466	-3.41511	25.75
1914A 36	-9.8602	-3.27184	26.5
1914A 37	-9.86465	-3.46628	27.25
1914A 38	-9.79144	-3.5981	28
1914A 39	-9.85594	-3.67237	28.75
1914A 40	-9.96373	-3.94401	29.5
1914A 41	-10.2868	-3.77734	30.25
1914A 42	-10.7263	-4.04868	31
1914A 43	-10.2418	-3.89031	31.75
1914A 44	-8.94901	-3.75211	32.5
1914A 45	-8.51418	-3.64055	33.25
1914A 46	-8.12194	-3.24266	34
1914A 47	-8.19724	-3.06088	34.75
1914A 48	-8.3834	-2.81608	35.5
1914A 49	-8.64426	-2.91133	36.25
1914A 50	-8.83141	-2.85064	37
1914A 51	-8.83419	-2.894	37.75
1914A 52	-8.87599	-2.83463	38.5
1914A 53	-8.89313	-3.05207	39.25
1914A 54	-8.65932	-2.86016	40
1914A 55	-8.38578	-2.91406	40.75
1914A 56	-8.31781	-3.08723	41.5
1914A 57	-8.24242	-3.05217	42.25
1914A 58	-8.11956	-2.8937	43
1914A 59	-8.24806	-2.84415	43.75
1914A 60	-8.27779	-2.73685	44.5
1914A 61	-8.35257	-2.67796	45.25
1914A 62	-8.30575	-2.66639	46
1914A 63	-8.26981	-2.60856	46.75
1914A 64	-8.26724	-2.69546	47.5
1914A 65	-8.21843	-2.67069	48.25
1914A 66	-8.08617	-2.91071	49
1914A 67	-8.04478	-3.11101	49.75
1914A 68	-8.29852	-4.0022	50.5
1914A 69	-8.15606	-3.09494	51.25
1914A 70	-8.57839	-3.20344	52

## Sheet: 1914B
Sample ID	d13C	d18O	Distance from tip (mm)
1914B 1	-10.1987	-3.09433	0.35			Location	Bangui
1914B 2	-10.9451	-2.85677	0.826			River	Oubangui River
1914B 3	-11.1363	-2.62514	1.276			Species	Chambardia wissmanni
1914B 4	-11.1658	-2.60037	1.676			Collected	1914-01-01
1914B 5	-11.3806	-2.79781	2.076
1914B 6	-11.1502	-2.67611	2.526
1914B 7	-11.4662	-2.60375	2.976
1914B 8	-11.1069	-2.56475	3.426
1914B 9	-11.437	-2.52135	3.876
1914B 10	-11.4333	-2.17888	4.326
1914B 11	-11.2299	-2.63568	4.776
1914B 12	-11.5256	-2.48103	5.226
1914B 13	-11.7971	-2.50303	5.676
1914B 14	-11.6107	-2.78932	6.126
1914B 15	-12.6143	-2.86751	6.576
1914B 16	-14.1926	-2.70661	7.476
1914B 17	-14.6054	-2.88921	7.926
1914B 18	-14.7822	-2.99822	8.376
1914B 19	-14.6251	-2.88819	8.826
1914B 20	-14.1628	-2.75114	9.276
1914B 21	-13.3301	-2.66076	9.726
1914B 22	-12.8838	-2.76055	10.176
1914B 23	-13.1496	-2.93107	10.626
1914B 24	-12.2043	-2.86874	11.076
1914B 25	-14.1937	-3.43445	11.976
1914B 26	-14.4464	-3.58051	12.426
1914B 27	-14.4329	-3.88275	12.876
1914B 28	-14.5113	-4.1415	13.326
1914B 29	-14.719	-4.14693	13.776
1914B 30	-15.155	-4.01929	14.226
1914B 31	-15.0586	-3.83977	14.676
1914B 32	-15.0531	-3.11859	15.126
1914B 33	-14.8096	-3.04469	15.576
1914B 34	-13.8601	-2.78113	16.026
1914B 35	-13.8708	-2.92893	16.476
1914B 36	-14.3563	-3.04458	16.926
1914B 37	-14.8059	-3.08379	17.376
1914B 38	-14.8092	-3.07294	17.826
1914B 39	-15.2115	-2.88962	18.276
1914B 40	-15.5433	-2.79024	18.726
1914B 41	-15.6664	-3.02248	19.176
1914B 42	-14.9184	-3.21838	19.626
1914B 43	-14.5254	-3.41234	20.076
1914B 44	-13.3204	-3.28256	20.526
1914B 45	-11.734	-3.13056	20.976
1914B 46	-11.1892	-3.15103	21.426
1914B 47	-11.5201	-3.20313	21.876
1914B 48	-12.2143	-3.24274	22.326
1914B 49	-12.4845	-3.24827	22.776
1914B 50	-12.5808	-3.41244	23.226
1914B 51	-12.6865	-3.38747	23.676
1914B 52	-13.5258	-2.87657	24.126
1914B 53	-13.7058	-2.79343	24.576
1914B 54	-12.8897	-2.9662	25.026
1914B 55	-12.7442	-2.7994	25.476
1914B 56	-13.347	-2.81352	25.926
1914B 57	-13.5218	-2.83072	26.376
1914B 58	-13.5965	-3.04326	26.826
1914B 59	-13.6287	-2.84947	27.276
1914B 60	-13.7277	-2.9321	27.726
1914B 61	-14.1029	-2.79796	28.176
1914B 62	-14.0045	-2.99875	28.626
1914B 63	-13.7813	-3.07633	29.076
1914B 64	-13.8839	-2.9562	29.526
1914B 65	-13.3848	-2.94961	29.976
1914B 66	-12.6968	-2.939	30.426
1914B 67	-12.7721	-3.1266	30.876
1914B 68	-12.3559	-2.51609	31.326
1914B 69	-11.4908	-2.67886	32.226
1914B 70	-11.0294	-2.64888	32.676
1914B 71	-10.9593	-2.59356	33.126
1914B 72	-11.1579	-2.52474	33.576
1914B 73	-11.2923	-2.77499	34.026
1914B 74	-11.3763	-2.78972	34.476
1914B 75	-11.2493	-2.81176	34.926
1914B 76	-10.7357	-2.61406	35.376
1914B 77	-10.8	-2.92458	35.826
1914B 78	-10.5261	-2.66135	36.276
1914B 79	-10.4835	-2.80775	36.726
1914B 80	-10.5579	-2.63755	37.176
1914B 81	-10.9725	-2.44562	37.626
1914B 82	-11.3656	-2.56028	38.076
1914B 83	-12.1252	-2.43614	38.526
1914B 84	-12.3812	-2.53875	38.976
1914B 85	-11.3417	-2.89903	39.876
1914B 86	-10.8819	-2.87718	40.326
1914B 87	-10.2254	-2.96228	41.226
1914B 88	-10.2764	-2.93076	42.126
1914B 89	-10.0951	-2.81764	42.576
1914B 90	-10.1467	-3.082	43.026
1914B 91	-10.1709	-3.01215	43.476
1914B 92	-10.2283	-2.89841	43.926
1914B 93	-10.3222	-3.00411	44.376
1914B 94	-10.6284	-3.34409	45.276
1914B 95	-10.9176	-3.02616	45.726
1914B 96	-10.9644	-2.82238	46.176
1914B 97	-10.9211	-2.60829	46.626
1914B 98	-10.8478	-2.67598	47.076
1914B 99	-10.7852	-2.61365	47.526
1914B 100	-10.371	-2.79085	47.976
1914B 101	-10.4795	-3.03141	48.426
1914B 102	-10.4277	-3.2423	48.876
1914B 103	-10.3293	-3.17204	49.326

## Sheet: 1948
Sample ID	d13C	d18O	Distance from tip (mm)
1948_1	-11.4321	-2.92355	0.2			Location	Mawuya
1948_2	-11.783	-2.70354	0.55			River	Oubangui River
1948_3	-11.9939	-2.67771	0.9			Species	Chambardia wissmanni
1948_4	-12.4385	-2.73005	1.25			Collected	~1948
1948_5	-12.6704	-2.78982	1.6
1948_6	-12.8931	-2.79928	1.95
1948_7	-12.8798	-3.03431	2.3
1948_8	-13.1877	-3.13933	2.65
1948_9	-13.3332	-2.95917	3
1948_10	-13.6927	-2.93756	3.35
1948_11	-13.9105	-2.95546	3.7
1948_12	-14.0156	-3.08513	4.05
1948_13	-13.6841	-2.9303	4.4
1948_14	-12.6528	-3.23084	4.75
1948_15	-12.2149	-3.36254	5.1
1948_16	-12.8816	-3.21599	5.45
1948_17	-13.2555	-3.29872	5.8
1948_18	-12.5162	-2.8815	6.15
1948_19	-11.6461	-2.47695	6.5
1948_20	-11.2615	-2.07561	6.85
1948_21	-11.6417	-2.32314	7.2
1948_22	-12.0296	-2.42444	7.55
1948_23	-12.8058	-2.687	7.9
1948_24	-12.3216	-2.54179	8.25
1948_25	-11.7586	-2.40806	8.6
1948_26	-11.1166	-2.29996	8.95
1948_27	-10.6156	-2.35564	9.3
1948_28	-10.2303	-2.42273	9.65
1948_29	-10.0375	-2.52957	10
1948_30	-9.89881	-2.55892	10.35
1948_31	-9.8451	-2.52303	10.7
1948_32	-9.6961	-2.74006	11.05
1948_33	-9.48934	-2.78434	11.4
1948_34	-10.771	-2.84388	11.75
1948_35	-11.1228	-2.83097	12.1
1948_36	-11.1141	-2.99634	12.45
1948_37	-11.1368	-3.101	12.8
1948_38	-11.0585	-3.10469	13.15
1948_39	-11.0562	-3.50136	13.5
1948_40	-11.1786	-3.36735	13.85
1948_41	-11.2513	-3.41448	14.2
1948_42	-11.3405	-3.44198	14.55
1948_43	-11.3841	-3.13186	14.9
1948_44	-12.0058	-2.87038	15.25
1948_45	-12.422	-2.7617	15.6
1948_46	-12.5839	-3.10234	15.95
1948_47	-12.4856	-2.90225	16.3
1948_48	-12.2661	-3.09798	16.65
1948_49	-12.3548	-3.10486	17
1948_50	-12.5996	-3.38093	17.35
1948_51	-12.5193	-3.35963	17.7
1948_52	-12.4984	-3.47855	18.05
1948_53	-12.6459	-3.40257	18.4
1948_54	-12.589	-3.25212	18.75
1948_55	-12.1534	-2.73419	19.1
1948_56	-11.78	-2.69914	19.45
1948_57	-11.547	-2.50089	19.8
1948_58	-11.1567	-2.08762	20.15
1948_59	-11.0637	-1.85515	20.5
1948_60	-11.0094	-2.07906	20.85
1948_61	-10.8077	-2.09215	21.2
1948_62	-10.8455	-2.18138	21.55
1948_63	-10.7204	-2.18943	21.9
1948_64	-10.481	-2.10204	22.25
1948_65	-10.394	-2.25585	22.6
1948_66	-11.0275	-2.46751	23.65
1948_67	-10.6913	-2.52102	24
1948_68	-9.86851	-2.51464	24.35
1948_69	-9.59609	-2.54399	24.7
1948_70	-9.68667	-2.78434	25.05
1948_71	-9.08425	-2.72832	25.4
1948_72	-8.71805	-2.7097	25.75
1948_73	-8.51871	-2.67281	26.1
1948_74	-8.49715	-2.70316	26.45
1948_75	-8.42105	-2.64614	26.8
1948_76	-8.39108	-2.46885	27.15
1948_77	-8.4229	-2.53645	27.5
1948_78	-8.52999	-2.64429	27.85
1948_79	-8.67562	-2.50357	28.2
1948_80	-8.70004	-2.70752	28.55
1948_81	-8.85005	-2.80464	28.9
1948_82	-8.81217	-2.79793	29.25
1948_83	-8.80645	-2.67079	29.6
1948_84	-8.81806	-2.79306	29.95
1948_85	-8.81907	-2.87256	30.3
1948_86	-8.83995	-2.76505	30.65
1948_87	-8.90814	-2.79172	31
1948_88	-8.88255	-2.74509	31.35
1948_89	-8.84079	-2.70685	31.7
1948_90	-8.76418	-2.76203	32.05
1948_91	-8.83911	-2.73755	32.4
1948_92	-8.81823	-2.82493	32.75
1948_93	-8.85056	-2.78199	33.1
1948_94	-9.08745	-2.81134	33.45
1948_95	-8.89854	-2.89537	33.8
1948_96	-9.25346	-2.88749	34.15
1948_97	-9.3496	-2.93596	34.5
1948_98	-9.54676	-2.78921	34.85
1948_99	-9.67101	-2.88799	35.2
1948_100	-9.6173	-2.93764	35.55
1948_101	-9.68263	-2.89336	35.9
1948_102	-9.6365	-3.06511	36.25
1948_103	-9.74324	-2.92523	36.6
1948_104	-9.68512	-2.98024	36.95
1948_105	-9.8269	-3.04617	37.3
1948_106	-9.8594	-3.10414	37.65
1948_107	-9.97643	-2.87498	38
1948_108	-9.98703	-2.95176	38.35
1948_109	-10.0596	-2.84481	38.7
1948_110	-10.0623	-3.04634	39.05
1948_111	-10.0754	-3.07583	39.4
1948_112	-10.3969	-3.6589	39.75
1948_113	-10.7672	-3.70552	40.1
1948_114	-10.8332	-3.45805	40.45
1948_115	-10.5449	-3.28296	40.8
1948_116	-10.2362	-3.31415	41.15
1948_117	-10.0517	-3.22075	41.5
1948_118	-9.98586	-3.21313	41.85
1948_119	-9.97727	-3.0199	42.2
1948_120	-9.91008	-3.06075	42.55
1948_121	-9.87321	-2.8221	42.9
1948_122	-9.95235	-3.06363	43.25
1948_123	-10.0003	-2.83938	43.6
1948_124	-9.97963	-2.86566	43.95
1948_125	-9.99192	-2.81684	44.3
1948_126	-10.1618	-3.05532	44.65
1948_127	-10.0453	-3.00837	45
1948_128	-10.2007	-3.09583	45.35
1948_129	-10.2277	-3.27584	45.7
1948_130	-10.2551	-3.01973	46.05
1948_131	-10.2805	-3.42415	46.4
1948_132	-10.5343	-3.12499	46.75
1948_133	-10.6766	-3.10499	47.1
1948_134	-10.6742	-3.42584	47.45
1948_135	-10.8591	-3.26245	47.8
1948_136	-10.9101	-3.33889	48.15
1948_137	-11.1782	-3.33533	48.5
1948_138	-10.9706	-3.68331	48.85
1948_139	-10.8908	-3.82399	49.2
1948_140	-10.7042	-4.0162	49.55
1948_141	-10.7847	-3.99214	49.9
1948_142	-10.9519	-3.80298	50.25
1948_143	-11.2151	-3.52348	50.6
1948_144	-11.3503	-3.60907	50.95
1948_145	-11.5229	-4.10536	51.3
1948_146	-11.3877	-3.92959	51.65
1948_147	-10.7155	-3.22482	52
1948_148	-10.5208	-3.18601	52.35
1948_149	-10.2344	-2.72447	52.7
1948_150	-10.046	-3.0577	53.05
1948_151	-10.1318	-3.24364	53.4
1948_152	-10.0039	-2.45785	53.75
1948_153	-9.97996	-2.69209	54.1
1948_154	-9.94982	-2.61395	54.45
1948_155	-9.75854	-2.43751	54.8
1948_156	-9.37664	-2.0736	55.15
1948_157	-9.49283	-2.66768	55.5
1948_158	-9.657	-2.51259	55.85
1948_159	-9.69253	-2.50598	56.2
1948_160	-9.99933	-2.46683	56.55
1948_161	-10.0621	-2.4231	56.9
1948_162	-10.2231	-2.8521	57.25
1948_163	-10.1211	-2.68429	57.6
1948_164	-10.0354	-2.30716	57.95
1948_165	-9.91126	-2.5348	58.3
1948_166	-9.74355	-2.6709	58.65
1948_167	-9.67721	-2.73565	59
1948_168	-9.58291	-2.69599	59.35
1948_169	-9.40022	-2.5509	59.7
1948_170	-9.32512	-2.60904	60.05
1948_171	-9.3044	-2.57463	60.4
1948_172	-9.31636	-2.50056	60.75
1948_173	-9.33236	-2.82532	61.1
1948_174	-9.2879	-2.32699	61.45
1948_175	-9.32966	-2.53209	61.8
1948_176	-9.39803	-2.36988	62.15
1948_177	-9.38388	-2.35259	62.5
1948_178	-9.461	-2.55582	62.85
1948_179	-9.49636	-2.36869	63.2
1948_180	-9.53593	-2.43327	63.55
1948_181	-9.56355	-2.74396	63.9
1948_182	-9.65751	-2.8221	64.25
1948_183	-9.67131	-2.65565	64.6
1948_184	-9.6925	-2.05995	64.95
1948_185	-9.68492	-1.9367	65.3
1948_186	-9.71995	-2.14793	65.65
1948_187	-9.74993	-1.99705	66
1948_188	-9.6957	-2.21524	66.35
1948_189	-9.80214	-2.14403	66.7
1948_190	-9.80282	-2.23151	67.05
1948_191	-9.89545	-2.53684	67.4
1948_192	-9.80534	-2.5248	67.75
1948_193	-9.83128	-2.65704	68.1
1948_194	-9.78766	-2.42088	68.45
1948_195	-9.81343	-2.33103	68.8
1948_196	-9.73814	-2.3785	69.15
1948_197	-9.88703	-2.5264	69.95
1948_198	-9.9106	-2.7535	70.3
1948_199	-9.89326	-2.49869	71
1948_200	-9.91448	-2.37578	71.35
1948_201	-10.0757	-2.61804	71.7
1948_202	-10.4022	-2.62991	72.05
1948_203	-10.7711	-2.72265	72.4
1948_204	-10.8041	-2.70637	72.75
1948_205	-10.721	-2.8108	73.1
1948_206	-10.8381	-2.73163	73.45
1948_207	-10.9929	-2.95372	73.8
1948_208	-11.0983	-2.7379	74.15
1948_209	-11.2137	-2.83488	74.5
1948_210	-11.164	-2.76808	74.85
1948_211	-10.9669	-2.81301	75.2
1948_212	-10.8221	-2.8898	75.55
1948_213	-10.5354	-2.72604	75.9
1948_214	-10.623	-2.89523	76.25
1948_215	-10.3448	-2.8837	76.6
1948_216	-10.3557	-3.10579	76.95
1948_217	-10.3953	-3.07069	77.3
1948_218	-10.2865	-3.06188	77.65
1948_219	-10.4192	-2.95151	78
1948_220	-10.4394	-2.60516	78.35
1948_221	-10.4034	-2.76384	78.7
1948_222	-10.3276	-2.77588	79.05
1948_223	-10.1525	-2.96864	79.4
1948_224	-10.2294	-2.65788	79.75
1948_225	-10.0484	-2.48361	80.1
1948_226	-10.1144	-2.63941	80.45
1948_227	-10.1856	-2.69976	80.8
1948_228	-10.3108	-3.08646	81.15
1948_229	-10.5812	-2.4046	81.5
1948_230	-10.5605	-3.07069	81.85
1948_231	-10.8017	-2.80962	82.2
1948_232	-10.8369	-2.78859	82.55
1948_233	-10.5769	-2.44275	82.9
1948_234	-10.5466	-2.56193	83.25
1948_235	-10.6311	-2.40003	83.6
1948_236	-10.2495	-2.57753	83.95
1948_237	-9.89124	-2.67687	84.3
1948_238	-10.0581	-2.55583	84.65
1948_239	-10.3544	-2.65585	85
1948_240	-10.8861	-2.53514	85.35
1948_241	-10.6927	-2.73265	85.7
1948_242	-11.3615	-2.93914	86.05
1948_243	-10.8066	-2.76113	86.4
1948_244	-12.7178	-3.24853	86.75
1948_245	-11.0808	-2.91812	87.1
1948_246	-11.2084	-2.46428	87.45
1948_247	-11.8728	-2.59906	87.8
1948_248	-11.6113	-2.52531	88.15
1948_249	-11.9289	-2.55617	88.5
1948_250	-11.5569	-2.37307	88.85
1948_251	-11.8656	-2.5048	89.2
1948_252	-12.0569	-2.60736	89.55
1948_253	-12.3515	-2.46055	89.9
1948_254	-10.5053	-2.19642	90.25
1948_255	-9.48956	-1.97518	90.6
1948_256	-9.21302	-1.75937	90.95
1948_257	-9.19348	-1.67307	91.3
1948_258	-9.37655	-2.21388	91.65
1948_259	-9.73747	-1.94229	92
1948_260	-9.5197	-2.15726	92.35
1948_261	-9.6221	-2.22524	92.7
1948_262	-9.78227	-2.16184	93.05

## Sheet: 1950s
Sample ID	d13C	d18O	Distance from tip (mm)
1950s 1	-12.2962	-3.6591	0			Location	Dongo
1950s 2	-11.7263	-3.22561	0.35			River	Oubangui River
1950s 3	-11.921	-3.00253	0.7			Species	Chambardia wissmanni
1950s 4	-12.1991	-3.3035	1.05			Collected	~1950s
1950s 5	-12.6599	-2.94945	1.4
1950s 6	-14.4382	-3.35814	1.75
1950s 7	-14.685	-3.26447	2.1
1950s 8	-14.915	-3.5637	2.45
1950s 9	-15.0887	-3.80169	2.8
1950s 10	-15.0947	-3.96493	3.15
1950s 11	-15.2141	-3.67836	3.5
1950s 12	-14.6275	-3.50437	3.85
1950s 13	-14.1578	-3.47592	4.2
1950s 14	-14.072	-3.48546	4.55
1950s 15	-14.081	-3.35675	4.9
1950s 16	-14.3657	-3.46881	5.25
1950s 17	-14.6615	-3.34773	5.6
1950s 18	-14.6959	-3.42909	5.95
1950s 19	-14.4109	-3.23515	6.3
1950s 20	-14.5559	-3.01155	6.65
1950s 21	-14.3869	-3.39197	7
1950s 22	-13.8569	-3.14079	7.35
1950s 23	-13.5719	-3.28684	7.7
1950s 24	-12.9132	-3.1191	8.05
1950s 25	-12.3076	-3.28407	8.4
1950s 26	-11.4016	-3.60672	8.75
1950s 27	-11.4794	-3.27227	9.1
1950s 28	-12.0573	-2.84728	9.45
1950s 29	-12.2888	-2.9609	9.8
1950s 30	-13.0926	-2.88648	10.15
1950s 31	-13.2996	-3.02803	10.5
1950s 32	-14.0354	-2.85734	10.85
1950s 33	-14.2684	-3.29552	11.2
1950s 34	-14.5594	-2.97114	11.55
1950s 35	-14.1819	-3.295	11.9
1950s 36	-13.0267	-3.10262	12.25
1950s 37	-12.7593	-3.0773	12.6
1950s 38	-12.3682	-2.97669	12.95
1950s 39	-12.961	-3.20028	13.3
1950s 40	-13.2302	-3.34825	13.65
1950s 41	-13.4968	-3.5578	14
1950s 42	-13.4465	-3.6395	14.35
1950s 43	-12.8738	-3.2584	14.7
1950s 44	-11.9639	-2.8249	15.05
1950s 45	-12.0563	-2.99872	15.4
1950s 46	-11.9238		15.75
1950s 47	-11.5993	-2.98484	16.1
1950s 48	-11.7037	-3.20306	16.45
1950s 49	-10.974	-3.261	18.55
1950s 50	-10.8097	-3.34461	18.9
1950s 51	-10.509	-3.28199	19.25
1950s 52	-10.3525	-3.23879	19.6
1950s 53	-10.1272	-3.57497	19.95
1950s 54	-9.88265	-3.22388	20.3
1950s 55	-9.90294	-3.19456	20.65
1950s 56	-9.81426	-3.26603	21
1950s 57	-9.79095	-3.48338	21.35
1950s 58	-9.70345	-3.25475	21.7
1950s 59	-9.75189	-3.09915	22.05
1950s 60	-9.2416	-3.38676	22.4
1950s 61	-9.19768	-3.38364	22.75
1950s 62	-9.15007	-3.19716	23.1
1950s 63	-8.95444	-3.63846	23.45
1950s 64	-9.0743	-3.24625	23.8
1950s 65	-9.26507	-3.42128	24.15
1950s 66	-9.42584	-3.41781	24.5
1950s 67	-9.86069	-3.15865	24.85
1950s 68	-10.1522	-3.414	25.2
1950s 69	-10.4511	-3.17461	25.55
1950s 70	-10.6421	-3.42111	25.9
1950s 71	-10.8648	-3.47696	26.25
1950s 72	-11.0171	-3.31321	26.95
1950s 73	-11.456	-3.18176	28
1950s 74	-11.4775	-3.09711	28.35
1950s 75	-11.794	-3.06779	28.7
1950s 76	-11.6541	-3.08786	29.05
1950s 77	-11.7417	-3.14145	29.4
1950s 78	-11.6881	-3.08385	29.75
1950s 79	-11.3595	-3.1774	30.1
1950s 80	-11.2975	-3.33169	30.45
1950s 81	-11.1659	-3.33396	30.8
1950s 82	-11.1001	-3.45579	31.15
1950s 83	-10.5319	-3.19817	31.5
1950s 84	-10.0982	-2.98087	31.85
1950s 85	-9.62895	-2.97913	32.2
1950s 86	-9.35414	-2.61835	32.55
1950s 87	-9.20539	-2.99832	32.9
1950s 88	-9.29649	-2.38081	33.25
1950s 89	-9.55668	-2.41711	33.6
1950s 90	-9.51768	-2.33333	33.95
1950s 91	-9.5555	-2.63075	34.3
1950s 92	-9.65937	-2.61242	34.65
1950s 93	-9.70896	-2.7037	35
1950s 94	-9.60996	-2.68677	35.35
1950s 95	-9.64441	-2.47663	35.7
1950s 96	-9.67399	-2.89901	36.05
1950s 97	-9.56659	-2.69253	36.4
1950s 98	-9.53214	-3.07076	36.75
1950s 99	-9.35851	-2.89936	37.1
1950s 100	-9.16455	-2.79534	37.45
1950s 101	-9.21548	-2.86585	38.15
1950s 102	-9.31666	-2.65169	38.5
1950s 103	-9.14438	-2.73896	38.85
1950s 104	-9.21884	-2.86533	39.2
1950s 105	-9.05429	-2.92484	39.55
1950s 106	-9.0037	-2.97145	39.9
1950s 107	-8.93058	-3.07285	40.25
1950s 108	-9.21581	-2.98279	40.6
1950s 109	-9.13446	-2.81314	40.95
1950s 110	-9.1274	-2.88051	41.3
1950s 111	-9.23161	-3.02957	41.65
1950s 112	-9.32271	-3.22592	42
1950s 113	-9.26287	-2.95626	42.35
1950s 114	-9.21027	-3.21685	42.7
1950s 115	-9.30523	-3.16728	43.05
1950s 116	-9.24338	-2.83723	43.4
1950s 117	-9.28523	-2.95678	43.75
1950s 118	-9.27565	-3.02677	44.1
1950s 119	-9.10976	-3.3933	44.45
1950s 120	-9.13631	-3.02032	44.8
1950s 121	-9.07698	-3.40395	45.15
1950s 122	-8.8489	-3.18107	45.5
1950s 123	-8.96454	-2.83653	45.85
1950s 124	-8.93563	-3.11736	46.2
1950s 125	-8.83511	-3.07495	46.55
1950s 126	-8.67157	-3.05906	46.9
1950s 127	-8.55745	-3.08996	47.25
1950s 128	-8.53257	-2.94876	47.6
1950s 129	-8.37828	-3.09938	47.95
1950s 130	-7.90665	-3.12539	48.3
1950s 131	-7.81908	-3.26327	48.65
1950s 132	-7.81908	-3.25228	49
1950s 133	-7.96464	-3.08926	49.35
1950s 134	-8.12818	-3.19922	49.7
1950s 135	-7.95186	-3.01386	50.05
1950s 136	-8.14532	-3.47586	50.4
1950s 137	-8.04901	-3.01892	50.75
1950s 138	-8.06532	-3.03096	51.1
1950s 139	-8.10851	-2.86445	51.45
1950s 140	-8.08683	-2.92188	51.8
1950s 141	-8.1117	-2.97267	52.15
1950s 142	-8.13624	-3.05749	52.5
1950s 143	-8.1265	-2.96446	52.85
1950s 144	-8.25054	-2.88208	53.2
1950s 145	-8.24718	-2.91612	53.55
1950s 146	-8.35576	-2.9985	53.9
1950s 147	-8.34248	-3.59507	54.25
1950s 148	-8.49627	-3.10287	54.6
1950s 149	-8.61863	-3.16518	55.3
1950s 150	-8.55039	-3.09031	55.65
1950s 151	-8.65628	-3.08298	56
1950s 152	-8.48114	-3.20725	57.05
1950s 153	-8.33105	-3.25018	57.4
1950s 154	-8.2297	-3.40849	57.75
1950s 155	-8.21457	-3.30551	58.1
1950s 156	-8.27525	-3.17339	58.45
1950s 157	-8.33155	-3.15139	58.8
1950s 158	-8.15759	-3.27916	59.15
1950s 159	-8.21608	-3.28753	59.5
1950s 160	-8.09994	-3.33274	59.85
1950s 161	-8.18364	-3.30604	60.2
1950s 162	-8.1349	-3.09833	60.55
1950s 163	-8.06279	-3.22959	60.9
1950s 164	-8.1107	-3.19538	61.25
1950s 165	-8.15036	-3.24407	61.6
1950s 166	-8.17154	-3.25699	61.95
1950s 167	-8.31928	-3.35735	62.3
1950s 168	-8.31592	-3.39086	62.65
1950s 169	-8.46904	-3.30569	63
1950s 170	-8.61157	-3.40674	63.35
1950s 171	-8.61123	-3.39051	63.7
1950s 172	-8.74822	-3.25298	64.05
1950s 173	-8.75864	-3.34513	64.4
1950s 174	-8.93832	-3.27759	64.75
1950s 175	-9.09597	-3.22994	65.1
1950s 176	-9.09009	-3.32314	65.45
1950s 177	-9.14135	-3.56051	65.8
1950s 178	-9.57466	-3.74779	66.15
1950s 179	-9.18052	-3.9356	66.5
1950s 180	-9.49213	-3.23395	66.85
1950s 181	-9.44087	-3.23692	67.2
1950s 182	-9.52525	-3.32628	67.9
1950s 183	-9.62391	-3.6614	68.25
1950s 184	-8.44265	-3.16763	68.6
